# Supplementary material for: Development of Gelatin-Coated Hydrogel Microspheres for Novel Bioink Design: A Crosslinker Study
Source: MDPI journal article supplement (doi:10.3390/pharmaceutics15010090), 2022-12-27
Supplement: s1 [file s1]

## Supplementary Material

**Movie S1.** Degradation of PM.

**Movie S2.** Degradation of EGM.

**Movie S3.** Degradation of TGM.

The scale bar represents 400  $\mu\text{m}$ .
