# Supplementary material for: Development of Gelatin-Coated Hydrogel Microspheres for Novel Bioink Design: A Crosslinker Study
Source: Pharmaceutics. 2022 Dec 27;15(1):90. doi: 10.3390/pharmaceutics15010090 (PMC9864922; doi:10.3390/pharmaceutics15010090)
Supplement: Supplementary file 1 [file pharmaceutics-15-00090-s001.zip]

Archive with 4 entries (4 files):
- Movie S1.mp4
- Movie S2.mp4
- Movie S3.mp4
- Supplementary Materials.pdf
